# Supplementary material for: CRISPR knockout screening identifies combinatorial drug targets in pancreatic cancer and models cellular drug response
Source: PubMed Central journal article supplement (PMC6189038; doi:10.1038/s41467-018-06676-2), 2018-10-15
Supplement: 41467_2018_6676_MOESM2_ESM.pdf [file 41467_2018_6676_MOESM2_ESM.pdf]

File Name: Supplementary Data 1

Description: sgRNA counts in control and trametinib treatment experiments, both in vivo and in vitro.

File Name: Supplementary Data 2

Description: CRISPR scores obtained from in vivo experiments.

File Name: Supplementary Data 3

Description: Gene expressions for cell lines in CGP data set. Attached for readers

File Name: Supplementary Software 1

Description: Implementation of DREBIC algorithm in R.
